# Supplementary material for: Genetic Contribution to Variation in Blood Calcium, Phosphorus, and Alkaline Phosphatase Activity in Pigs
Source: PubMed Central journal article supplement (PMC6610066; doi:10.3389/fgene.2019.00590), 2019-06-28
Supplement: Data_Sheet_1.pdf [file Data_Sheet_1.pdf]

# 1 Supplementary Figures

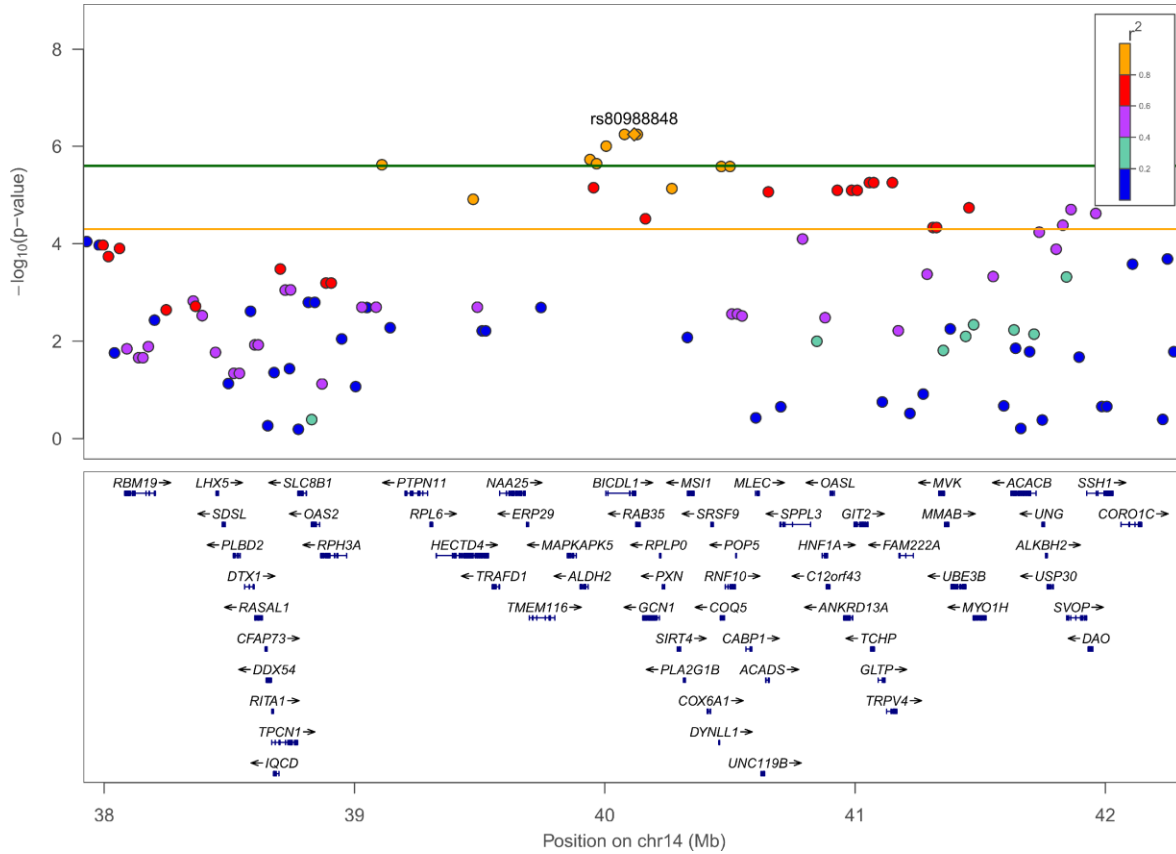

**Supplementary Figure 1.** Genomic region on porcine chromosome 14 which represents a QTL for the hematological level of inorganic phosphorus. The upper panel shows the significance level of SNP markers and their linkage disequilibrium ( $r^2$ ) with the highest significantly associated marker in this QTL (rs80988848). The lower panel indicates the genomic positions of genes.

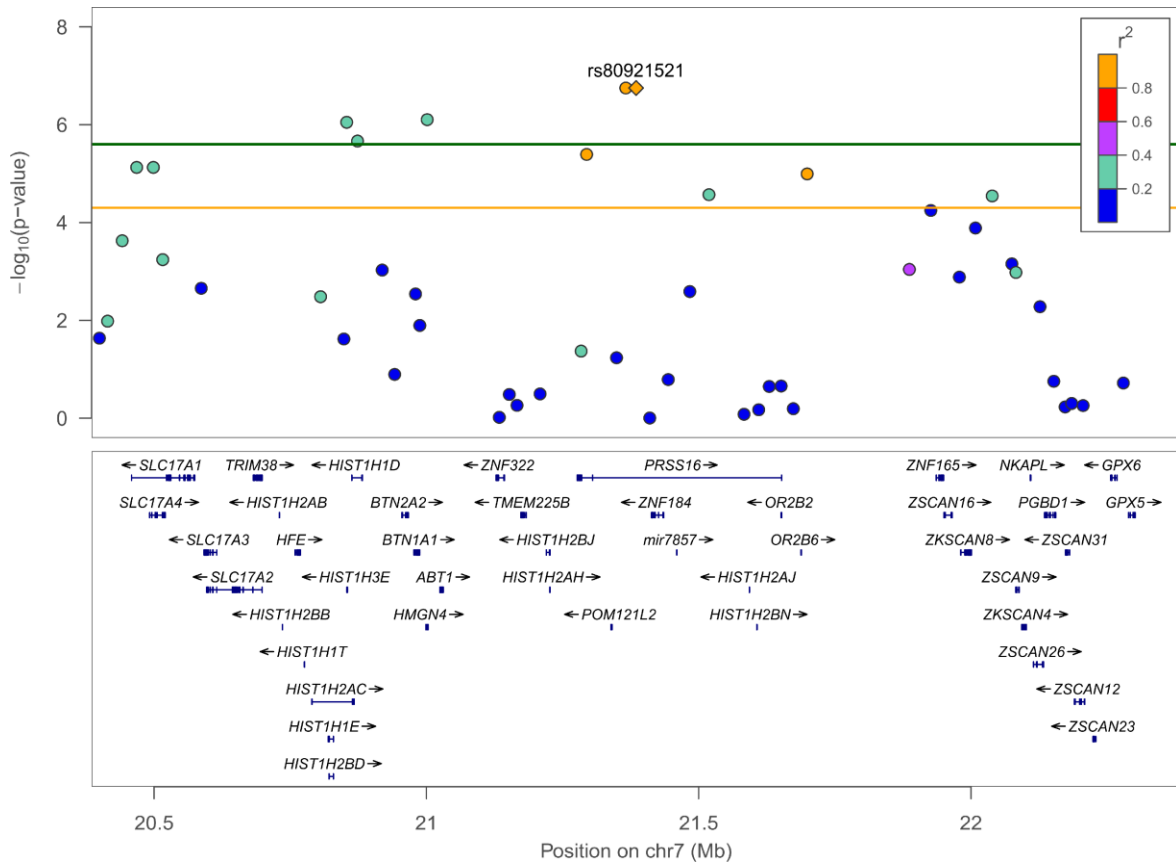

**Supplementary Figure 2.** QTL region for alkaline phosphatase activity on porcine chromosome 7. The upper panel shows the significance level of SNP markers and their linkage disequilibrium ( $r^2$ ) with the highest significantly associated marker in this QTL (rs80921521). The lower panel indicates the genomic positions of genes.

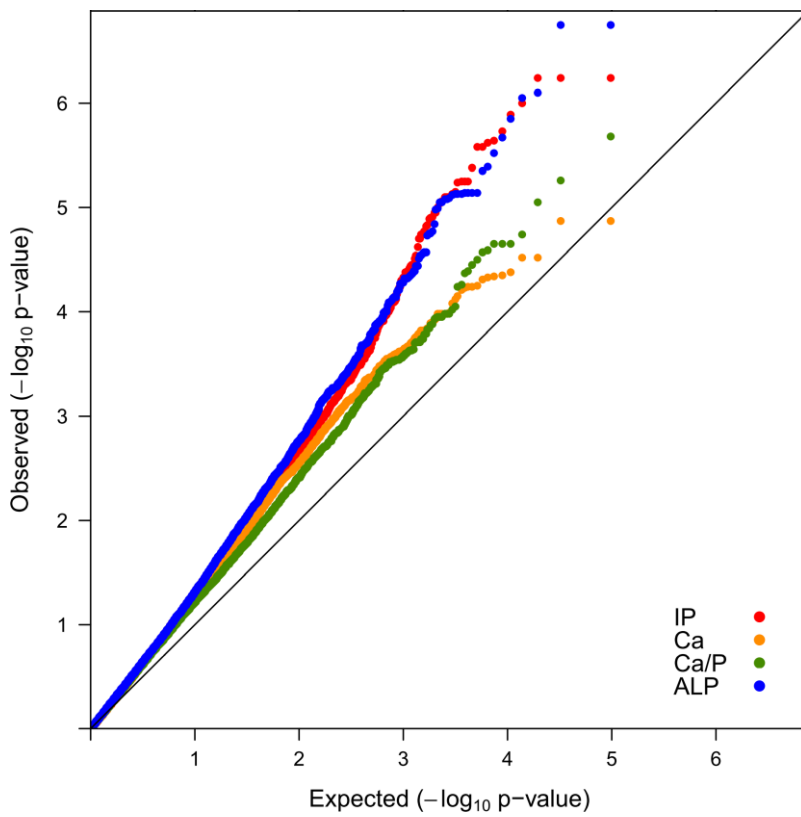

**Supplementary Figure 3.** Quantile-quantile (QQ) plots comparing the observed and expected distributions of p-values from GWAS of inorganic phosphorus (IP), calcium (Ca), alkaline phosphatase (ALP) and calcium/phosphorus ratio (Ca/P) in pigs.

## 2 Supplementary Table

**Supplementary Table 1.** Mapped quantitative trait loci (QTL) for inorganic phosphorus (IP), calcium (Ca), alkaline phosphatase (ALP) and calcium/phosphorus ratio (Ca/P) in pigs based on the QTL database (<https://www.animalgenome.org/QTLdb>; accessed on 25/03/2019)

| Trait | Chromosome | QTL interval<br>in Mbp | Reference           |
|-------|------------|------------------------|---------------------|
| IP    | 2          | 150.5 - 150.6          | Bovo et al., 2016   |
|       | 7          | 8.0 - 11.4             | Yoo et al., 2012    |
|       | 7          | 30.0 - 30              | Bovo et al., 2016   |
|       | 7          | 30.1 - 30.1            | Bovo et al., 2016   |
|       | 7          | 30.2 - 30.2            | Bovo et al., 2016   |
|       | 12         | 15.8 - 53.6            | Yoo et al., 2012    |
|       | 14         | 42.1 - 42.1            | Just et al., 2018   |
|       | 15         | 136.7 - 157.7          | Yoo et al., 2012    |
|       | Ca         | 4                      | 120.5 - 140.4       |
| 6     |            | 34.5 - 129.7           | Reiner et al., 2009 |
| 8     |            | 13.6 - 13.6            | Bovo et al., 2016   |
| 11    |            | 2.6 - 2.6              | Bovo et al., 2016   |
| 12    |            | 22.9 - 22.9            | Bovo et al., 2016   |
| 13    |            | 84.5 - 84.5            | Bovo et al., 2016   |
| 13    |            | 90.6 - 90.6            | Bovo et al., 2016   |
| 13    |            | 93.0 - 93              | Bovo et al., 2016   |
| 13    |            | 93.5 - 93.5            | Bovo et al., 2016   |
| 13    |            | 93.6 - 93.6            | Bovo et al., 2016   |
| 13    |            | 93.7 - 93.7            | Bovo et al., 2016   |
| 13    |            | 93.9 - 93.9            | Bovo et al., 2016   |
| 13    |            | 94.5 - 94.5            | Bovo et al., 2016   |
| 13    |            | 95.4 - 95.4            | Bovo et al., 2016   |
| 13    |            | 95.5 - 95.5            | Bovo et al., 2016   |
| 13    |            | 206.7 - 206.7          | Reiner et al., 2009 |
| 14    |            | 13.4 - 93.4            | Yoo et al., 2012    |
| 15    |            | 135.8 - 154.6          | Yoo et al., 2012    |
| 18    |            | 7.8 - 47.7             | Yoo et al., 2012    |
| Ca/P  | 5          | 68.3 - 68.3            | Just et al., 2018   |
| ALP   | 1          | 265.3 - 279.1          | Reiner et al., 2009 |
|       | 2          | 10.8 - 21.1            | Reiner et al., 2009 |
|       | 5          | 63.1 - 90.7            | Reiner et al., 2009 |
|       | 6          | 17.8 - 152.3           | Yoo et al., 2012    |
|       | 6          | 34.5 - 129.7           | Reiner et al., 2009 |
|       | 7          | 37.0 - 99.6            | Reiner et al., 2009 |
|       | 7          | 11.6 - 37              | Reiner et al., 2009 |
|       | 8          | 11.3 - 124.2           | Yoo et al., 2012    |
|       | 12         | 63.0 - 63.2            | Reiner et al., 2009 |
|       | 13         | 7.7 - 7.8              | Reiner et al., 2009 |
